# Supplementary material
Source: PubMed Central journal article supplement (PMC5486405)
Supplement: NIHMS869092-supplement-Sup_Fig_2.pdf [file NIHMS869092-supplement-Sup_Fig_2.pdf]

# Figure S2

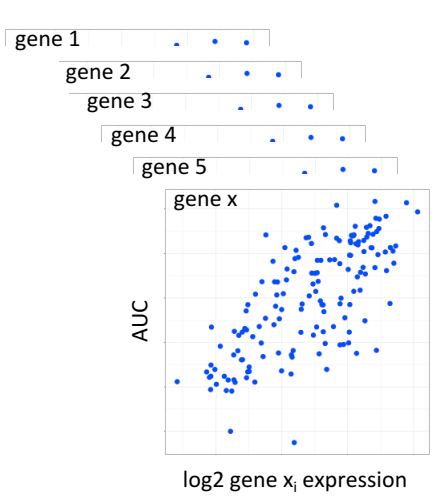

Correlate AUC values with expression of all genes across all samples in data set

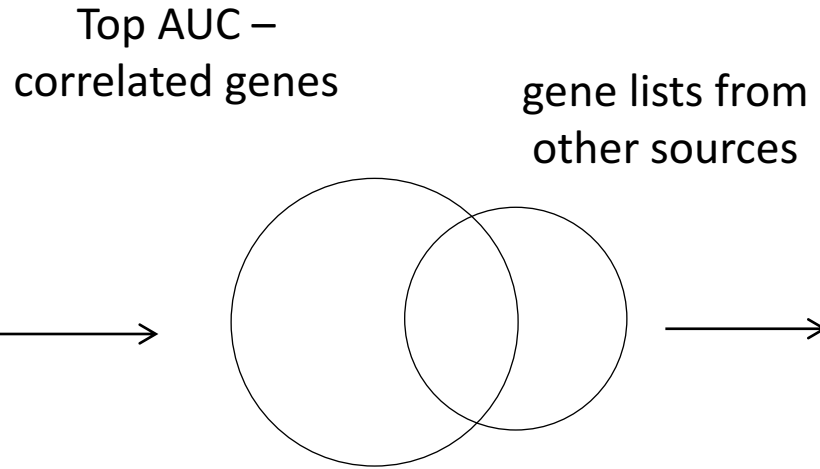

Is overlap what would be expected by chance (hypergeometric p-value)?
