# Supplementary material
Source: PubMed Central journal article supplement (PMC5486405)

Figure S1

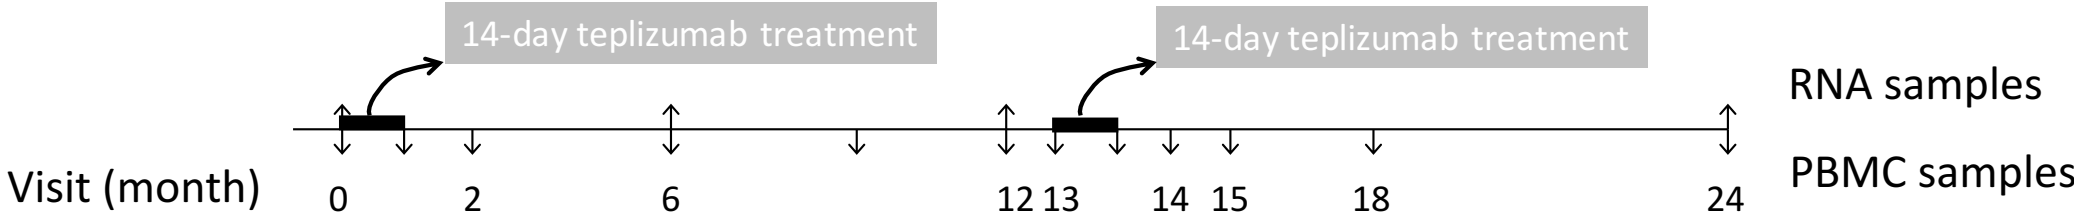

Supplement: NIHMS869092-supplement-Sup_Fig_1.pdf [file NIHMS869092-supplement-Sup_Fig_1.pdf]

Figure S3

A

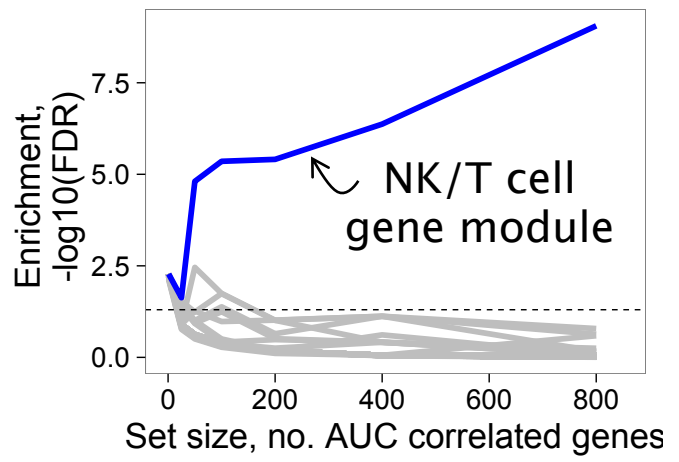

B

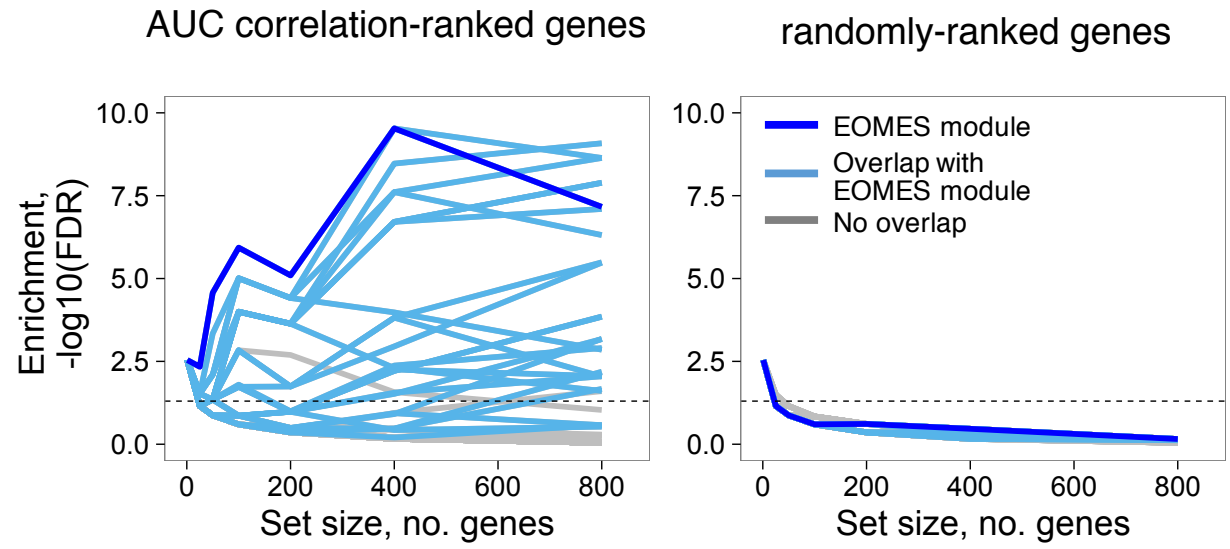

Supplement: NIHMS869092-supplement-Sup_Fig_3.pdf [file NIHMS869092-supplement-Sup_Fig_3.pdf]

Figure S4

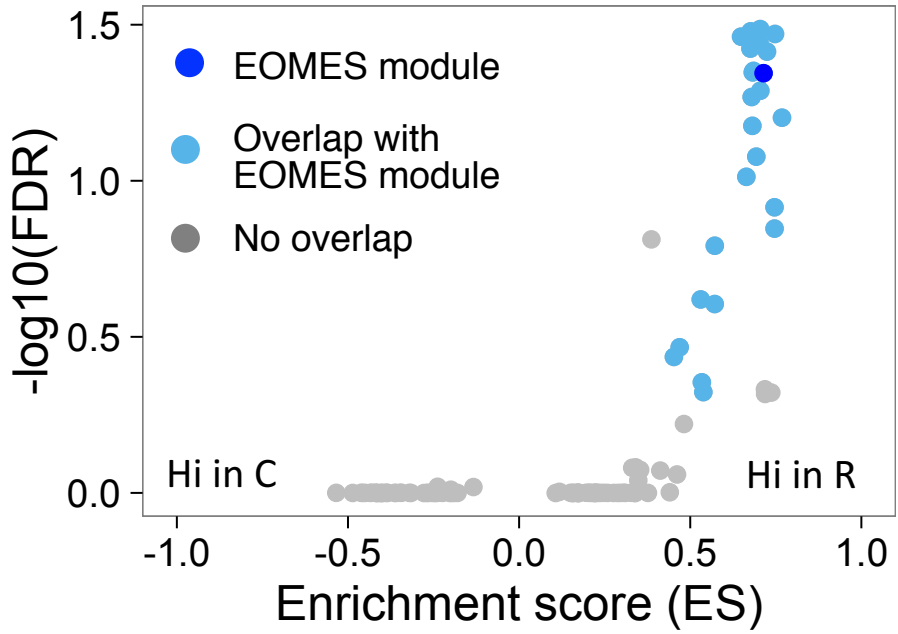

Supplement: NIHMS869092-supplement-Sup_Fig_4.pdf [file NIHMS869092-supplement-Sup_Fig_4.pdf]

Figure S5

A

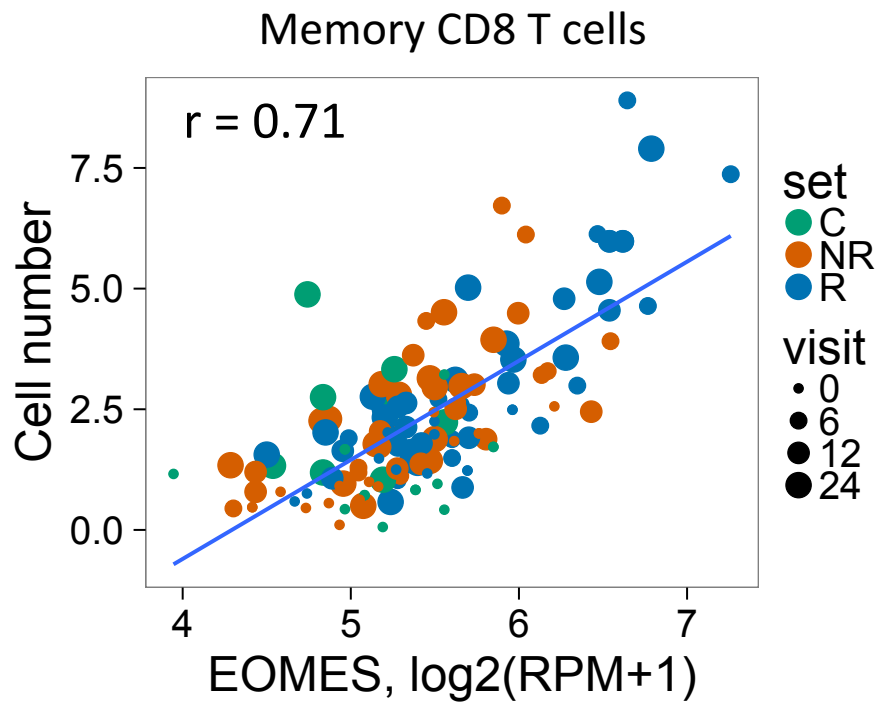

B

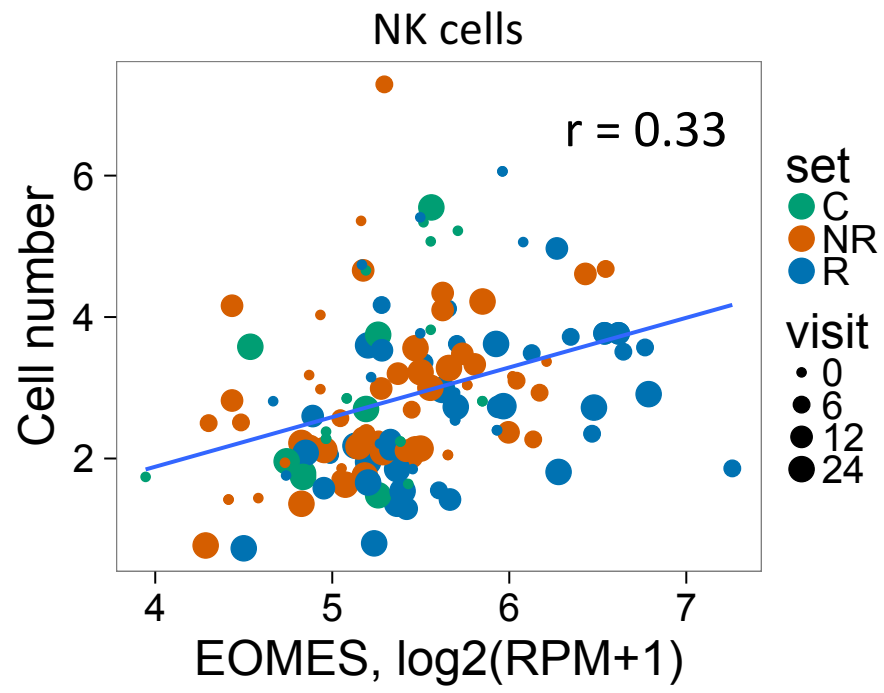

Supplement: NIHMS869092-supplement-Sup_Fig_5.pdf [file NIHMS869092-supplement-Sup_Fig_5.pdf]

Figure S6

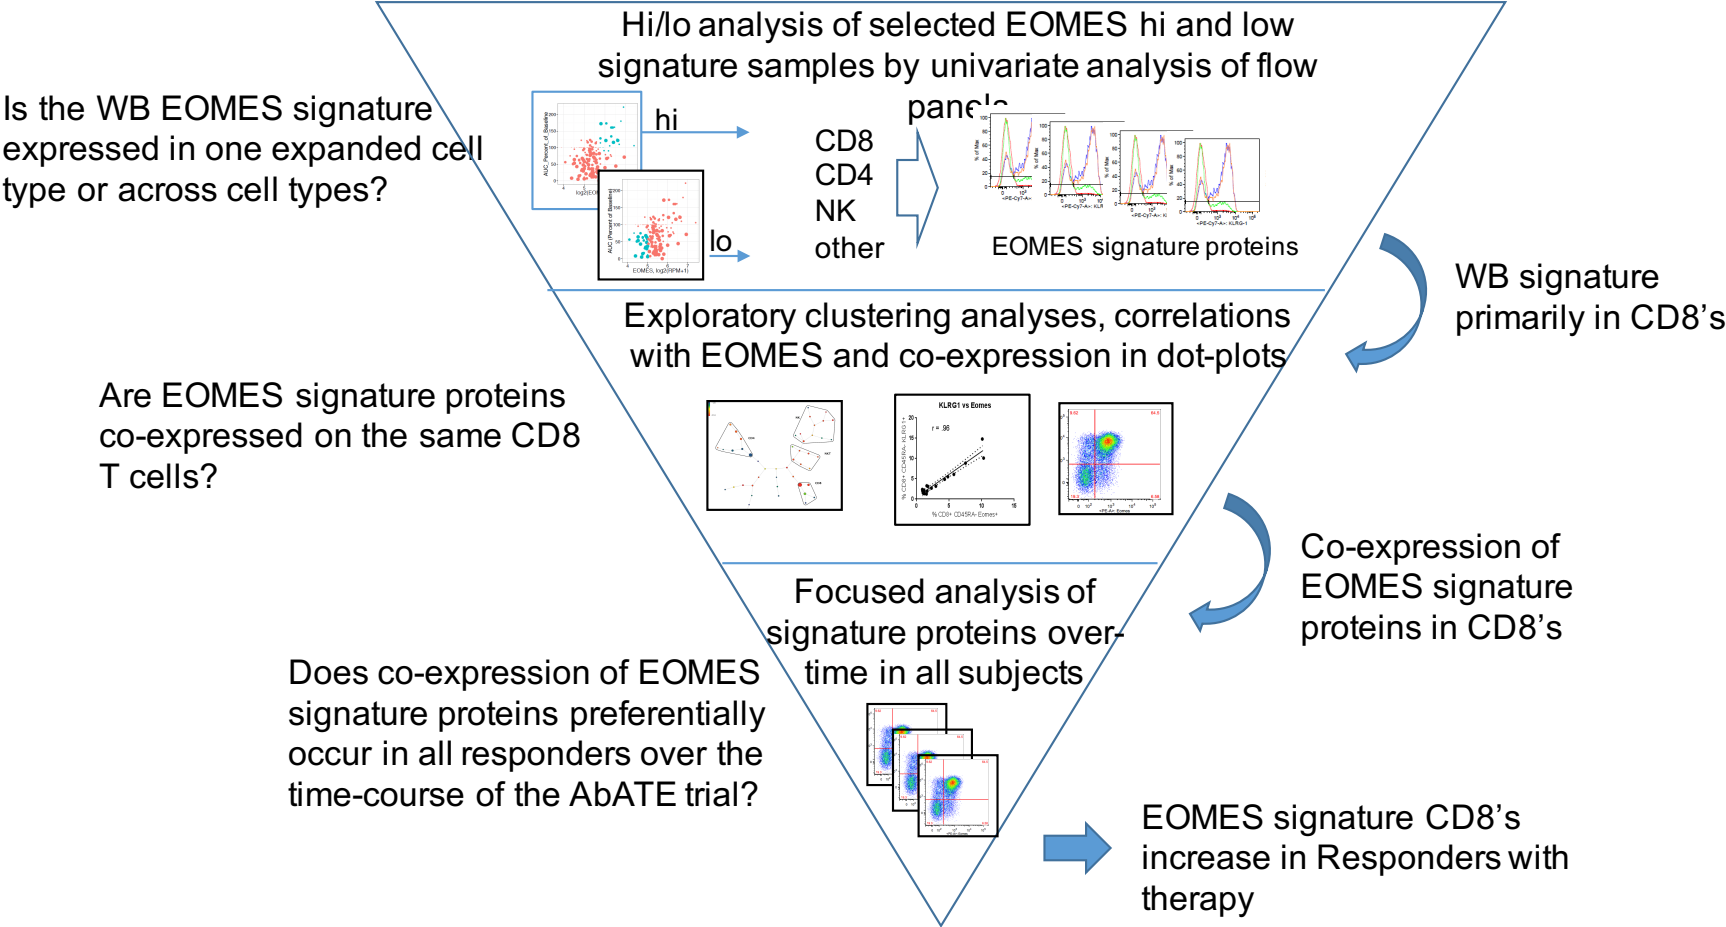

Supplement: NIHMS869092-supplement-Sup_Fig_6.pdf [file NIHMS869092-supplement-Sup_Fig_6.pdf]

# Figure S7

Site: 001  
Patient: 009  
Visit: -1

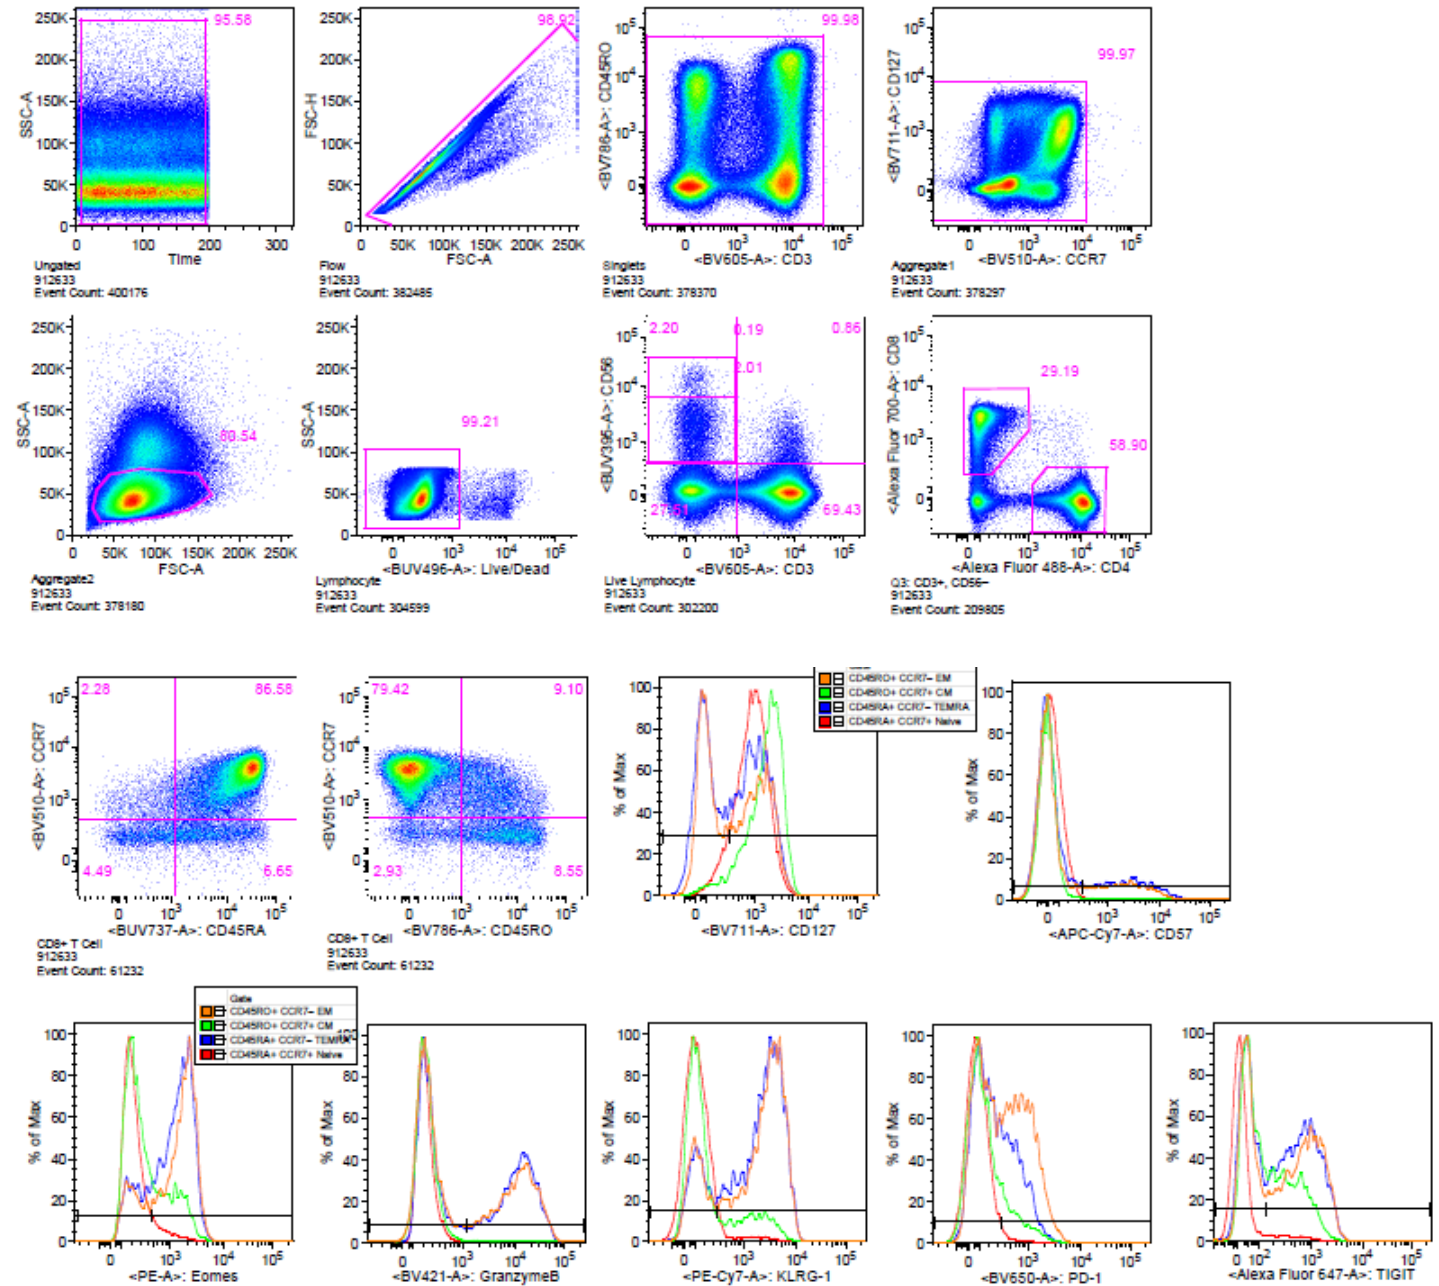

Supplement: NIHMS869092-supplement-Sup_Fig_7.pdf [file NIHMS869092-supplement-Sup_Fig_7.pdf]

# Figure S8

## T cell gating

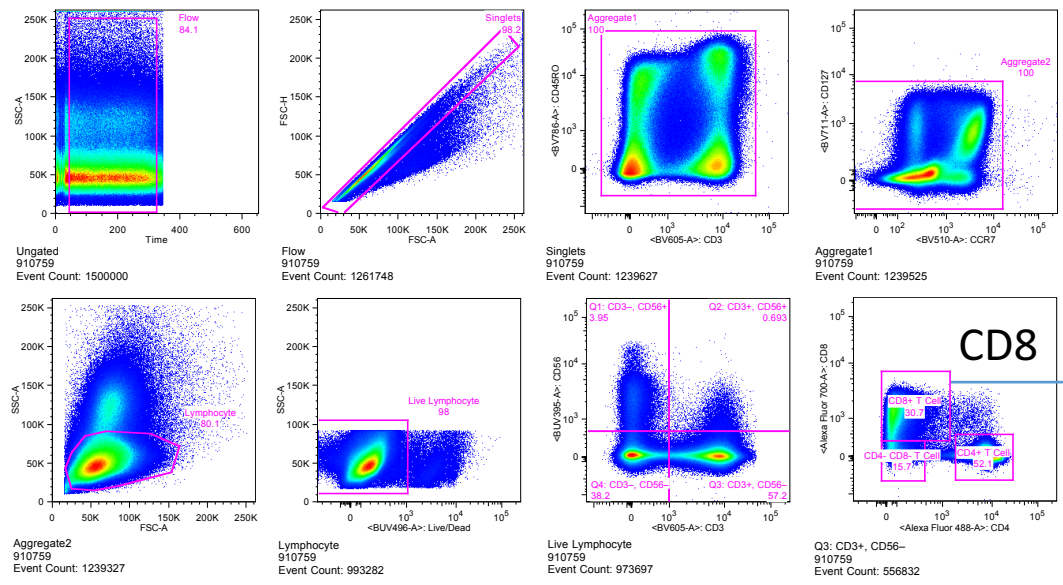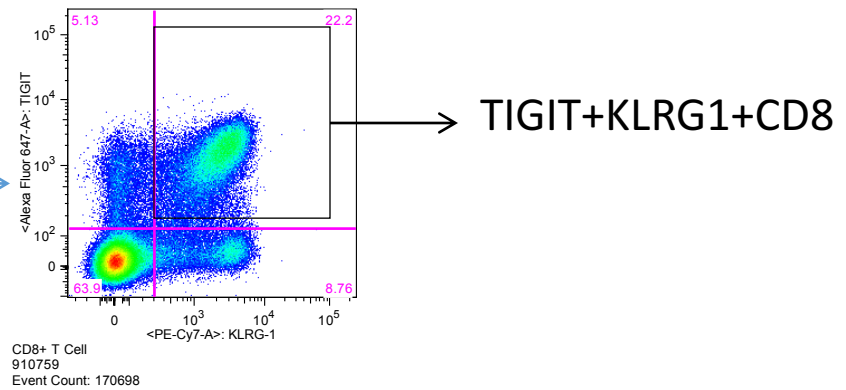

## T cell subsets for TIGIT+KLRG1+CD8 analysis

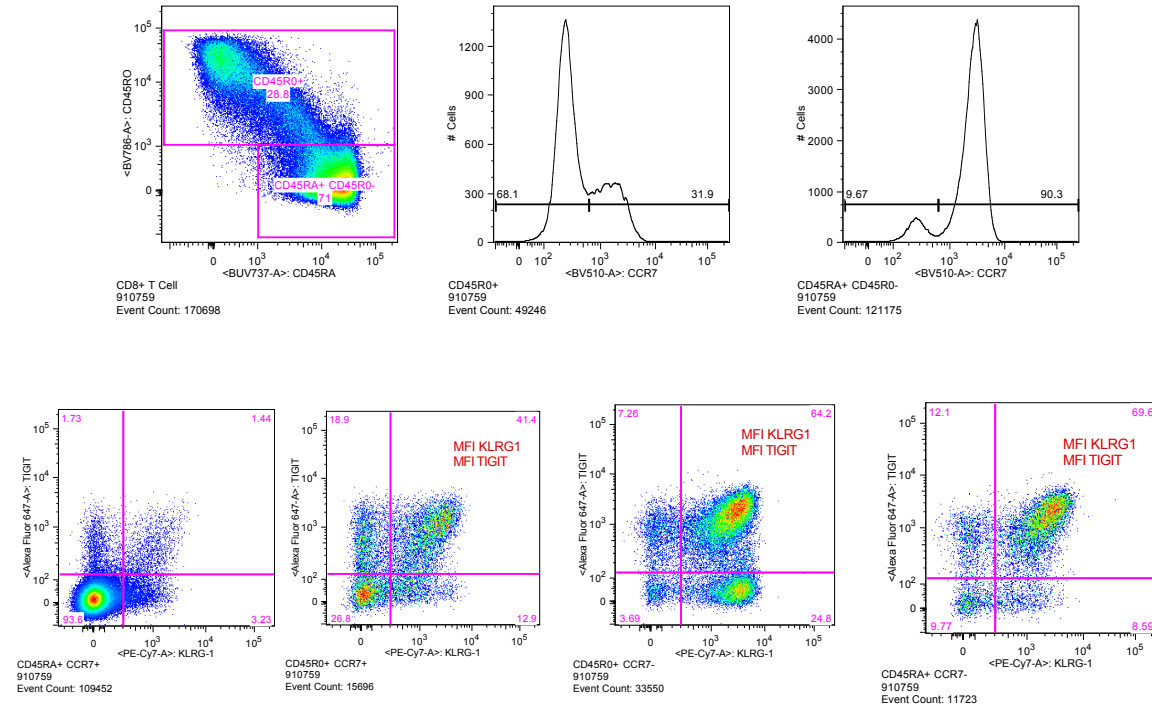

Supplement: NIHMS869092-supplement-Sup_Fig_8.pdf [file NIHMS869092-supplement-Sup_Fig_8.pdf]
